# Supplementary material for: Preoperative Neutrophil‐to‐Lymphocyte Ratio Was a Predictor of Overall Survival in Small Renal Cell Carcinoma: An Analysis of 384 Consecutive Patients
Source: Hindawi journal article supplement (doi:10.1155/2020/8051210), 2020-01-01
Supplement: f1 [file 8051210.f1.pdf]

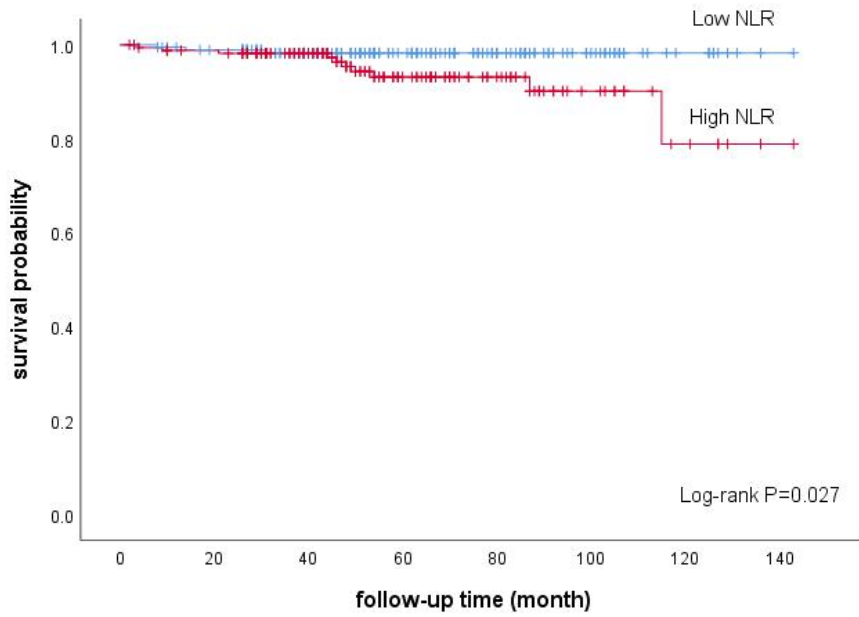

**FIGURE S1:** Kaplan-Meier curve for overall survival for patients without multiple primary neoplasms categorized by NLR (cutoff value=1.97).

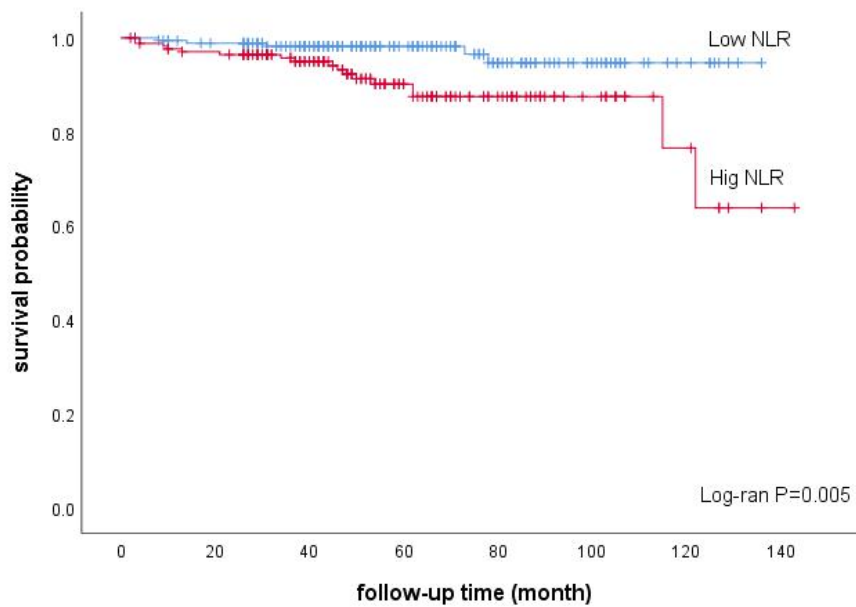

**FIGURE S2:** Kaplan-Meier curve for overall survival for clear cell renal carcinoma patients categorized by NLR (cutoff value=1.97).

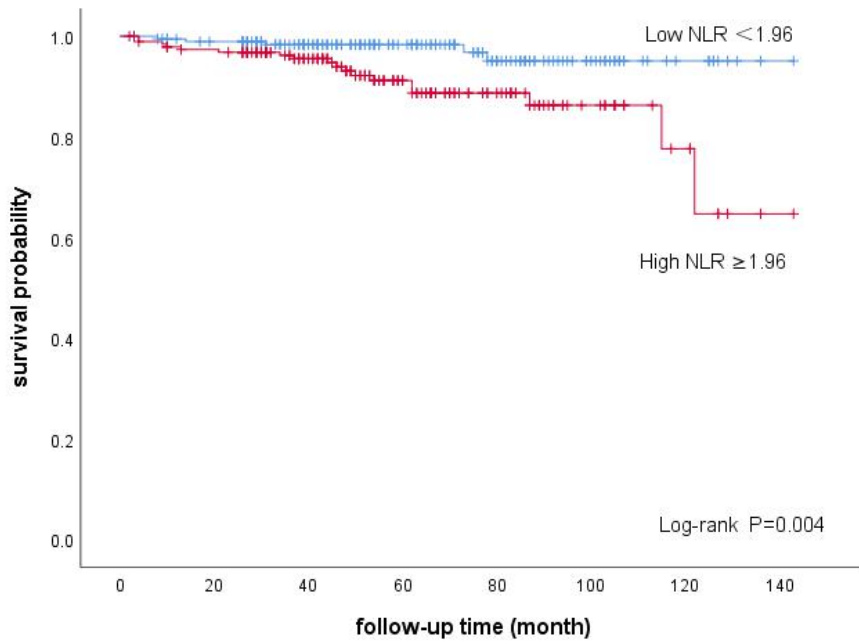

**FIGURE S3:** Kaplan–Meier curves for sRCC patients’ overall survival categorized by NLR (cutoff value=1.96, n=384).

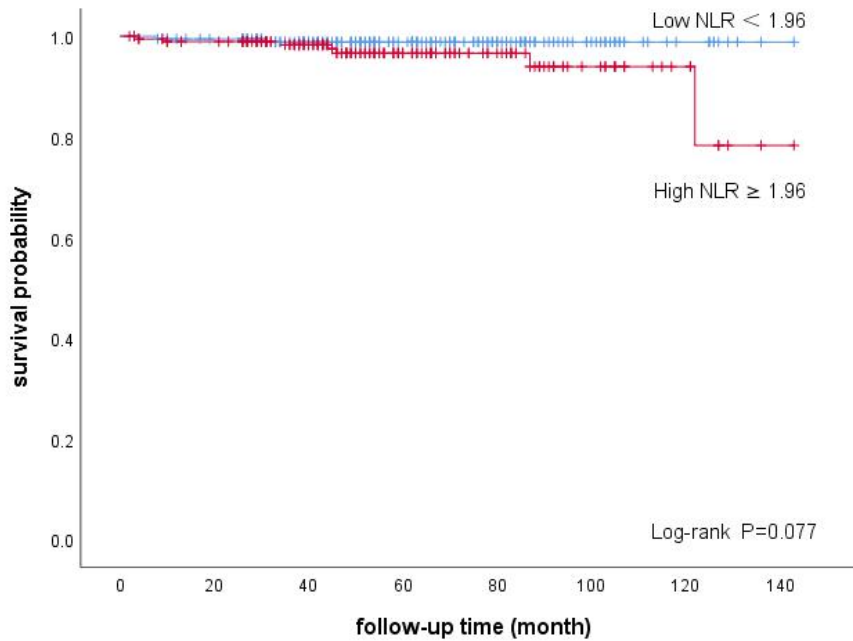

**FIGURE S4:** Kaplan–Meier curves for sRCC patients cancer-specific survival categorized by NLR (cutoff value=1.96, n=384).

**TABLE S1:** Multivariate regression models (cutoff value=1.96, n=384).

|                             | Overall survival |              |         | Cancer-specific survival |              |         |
|-----------------------------|------------------|--------------|---------|--------------------------|--------------|---------|
|                             | HR               | 95%CI        | P value | HR                       | 95%CI        | P value |
| Age ( $\geq 60$ years)      | 5.528            | 1.873-16.317 | 0.002   | 9.791                    | 1.212-79.097 | 0.032   |
| Multiple primary neoplasms  | 7.021            | 3.054-16.142 | <0.001  | 4.827                    | 1.192-19.543 | 0.027   |
| NLR ( $\geq 1.96$ , median) | 2.995            | 1.102-8.138  | 0.032   |                          | NA           |         |

**Abbreviation:** NLR, neutrophil-to-lymphocyte ratio. HR, hazard ratio. CI, confidence interval. NA, not applicable.
